# Supplementary material for: Optimization of cerebrospinal fluid microbial DNA metagenomic sequencing diagnostics
Source: PubMed Central journal article supplement (PMC8888594; doi:10.1038/s41598-022-07260-x), 2022-03-01
Supplement: 41598_2022_7260_MOESM1_ESM.pdf [file 41598_2022_7260_MOESM1_ESM.pdf]

## Additional figure 1. Enterovirus samples

### Sample 8 – 1,455,168 total classified reads

| Viruses                               | Taxid   | % (RNA) | Reads (RNA) |
|---------------------------------------|---------|---------|-------------|
| Enterobacteria phage T4 sensu lato    | 348604  | 4.2333  | 61783       |
| Enterovirus B                         | 138949  | 0.1643  | 2398        |
| Escherichia virus M13                 | 1977402 | 0.1433  | 2092        |
| Enterobacteria phage RB3              | 31533   | 0.0843  | 1231        |
| Escherichia virus T7                  | 1985738 | 0.0276  | 403         |
| Pseudomonas phage PPpW-4              | 1279083 | 0.0246  | 359         |
| Shigella phage SHFML-26               | 1863009 | 0.0166  | 242         |
| Escherichia virus P1                  | 10678   | 0.0094  | 137         |
| Enterobacteria phage 933W sensu lato  | 374810  | 0.0035  | 51          |
| Escherichia phage vB_EcoM-UFV13       | 1815590 | 0.0034  | 49          |
| Enterobacteria phage RB32             | 45406   | 0.0026  | 38          |
| untyped human enterovirus             | 235406  | 0.0023  | 33          |
| Escherichia virus lme09               | 1054834 | 0.0010  | 15          |
| Escherichia virus Lambda              | 10710   | 0.0009  | 13          |
| Escherichia phage UFV-AREG1           | 1837867 | 0.0009  | 13          |
| Enterobacteria phage RB27             | 69609   | 0.0008  | 11          |
| Escherichia phage slur07              | 1720500 | 0.0008  | 11          |
| Escherichia virus AR1                 | 1914199 | 0.0008  | 12          |
| Shigella virus Pss1                   | 1551641 | 0.0007  | 10          |
| Escherichia phage HK639               | 906669  | 0.0005  | 8           |
| Enterobacteria phage RB51             | 10693   | 0.0005  | 7           |
| Escherichia virus E112                | 1495285 | 0.0005  | 8           |
| Salmonella phage RE-2010              | 929814  | 0.0004  | 6           |
| Stx converting phage vB_EcoS_ST2-8624 | 1792289 | 0.0004  | 6           |

### Sample 9 – 1,875,002 total classified reads

| Viruses                            | Taxid   | % (RNA) | Reads (RNA) |
|------------------------------------|---------|---------|-------------|
| Escherichia virus T7               | 10760   | 0.0584  | 1101        |
| Enterovirus B                      | 138949  | 0.0316  | 595         |
| Enterobacteria phage T4 sensu lato | 348604  | 0.0135  | 254         |
| Enterovirus A                      | 138948  | 0.0119  | 224         |
| BeAn 58058 virus                   | 67082   | 0.0052  | 98          |
| Escherichia virus M13              | 1977402 | 0.0005  | 9           |

Results of viral species detected in RNA sequencing datasets of sample 8 and sample 9 in PaRCA. Reads mapping to enterovirus was found amongst virus lists in both specimens.

# Additional figure 2. Detected pathogens in bioinformatic classifiers

a.

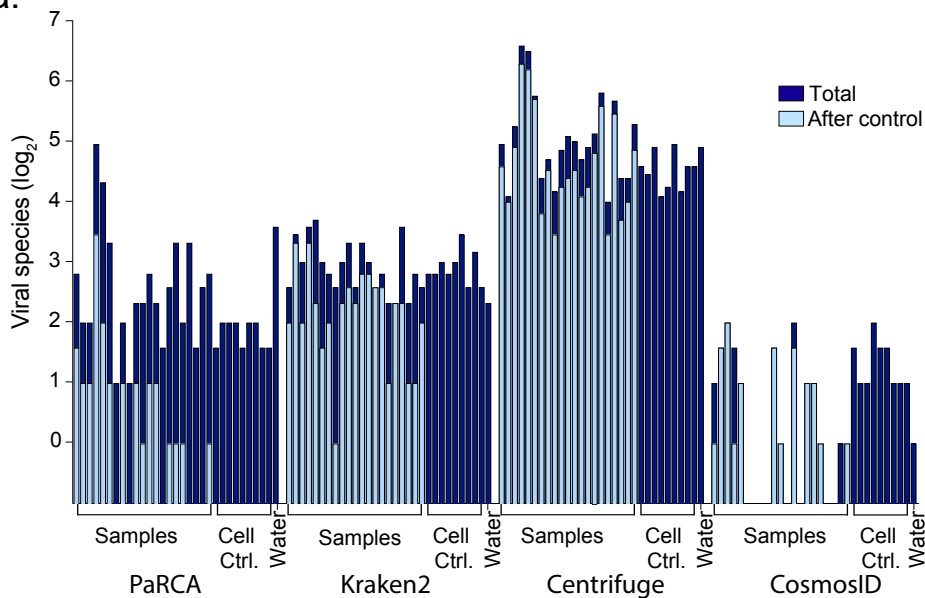

b.

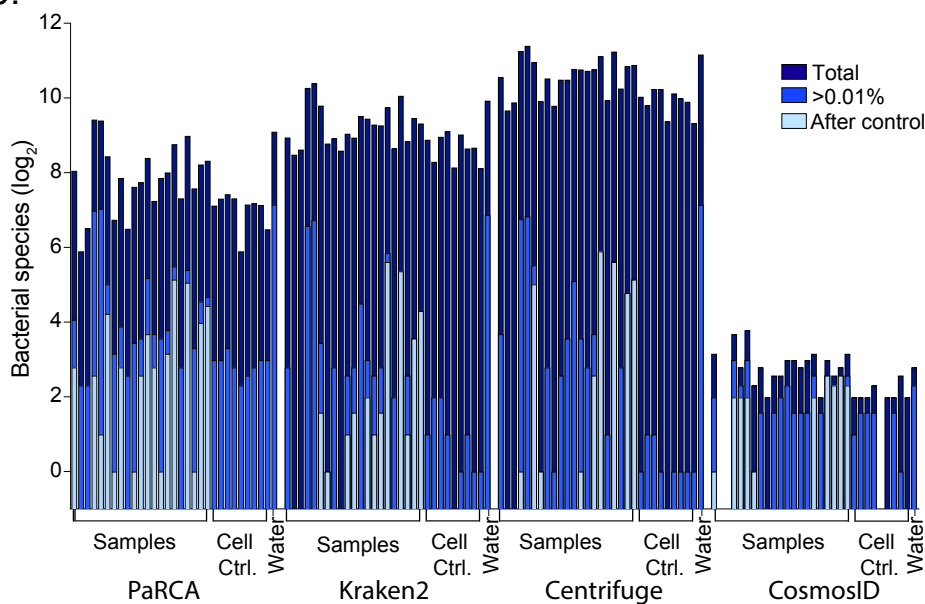

Number of viral (a) and bacterial species (b) classified in each of the samples and controls using the different bioinformatic classifiers. Dark blue bars show the total number of species classified, bright blue bars show the number of bacterial species over the fraction cutoff (0.01% of the dataset), light blue bars show number of species not removed using controls.

Additional figure 3. Coverage density plot of microbial species in CSF samples

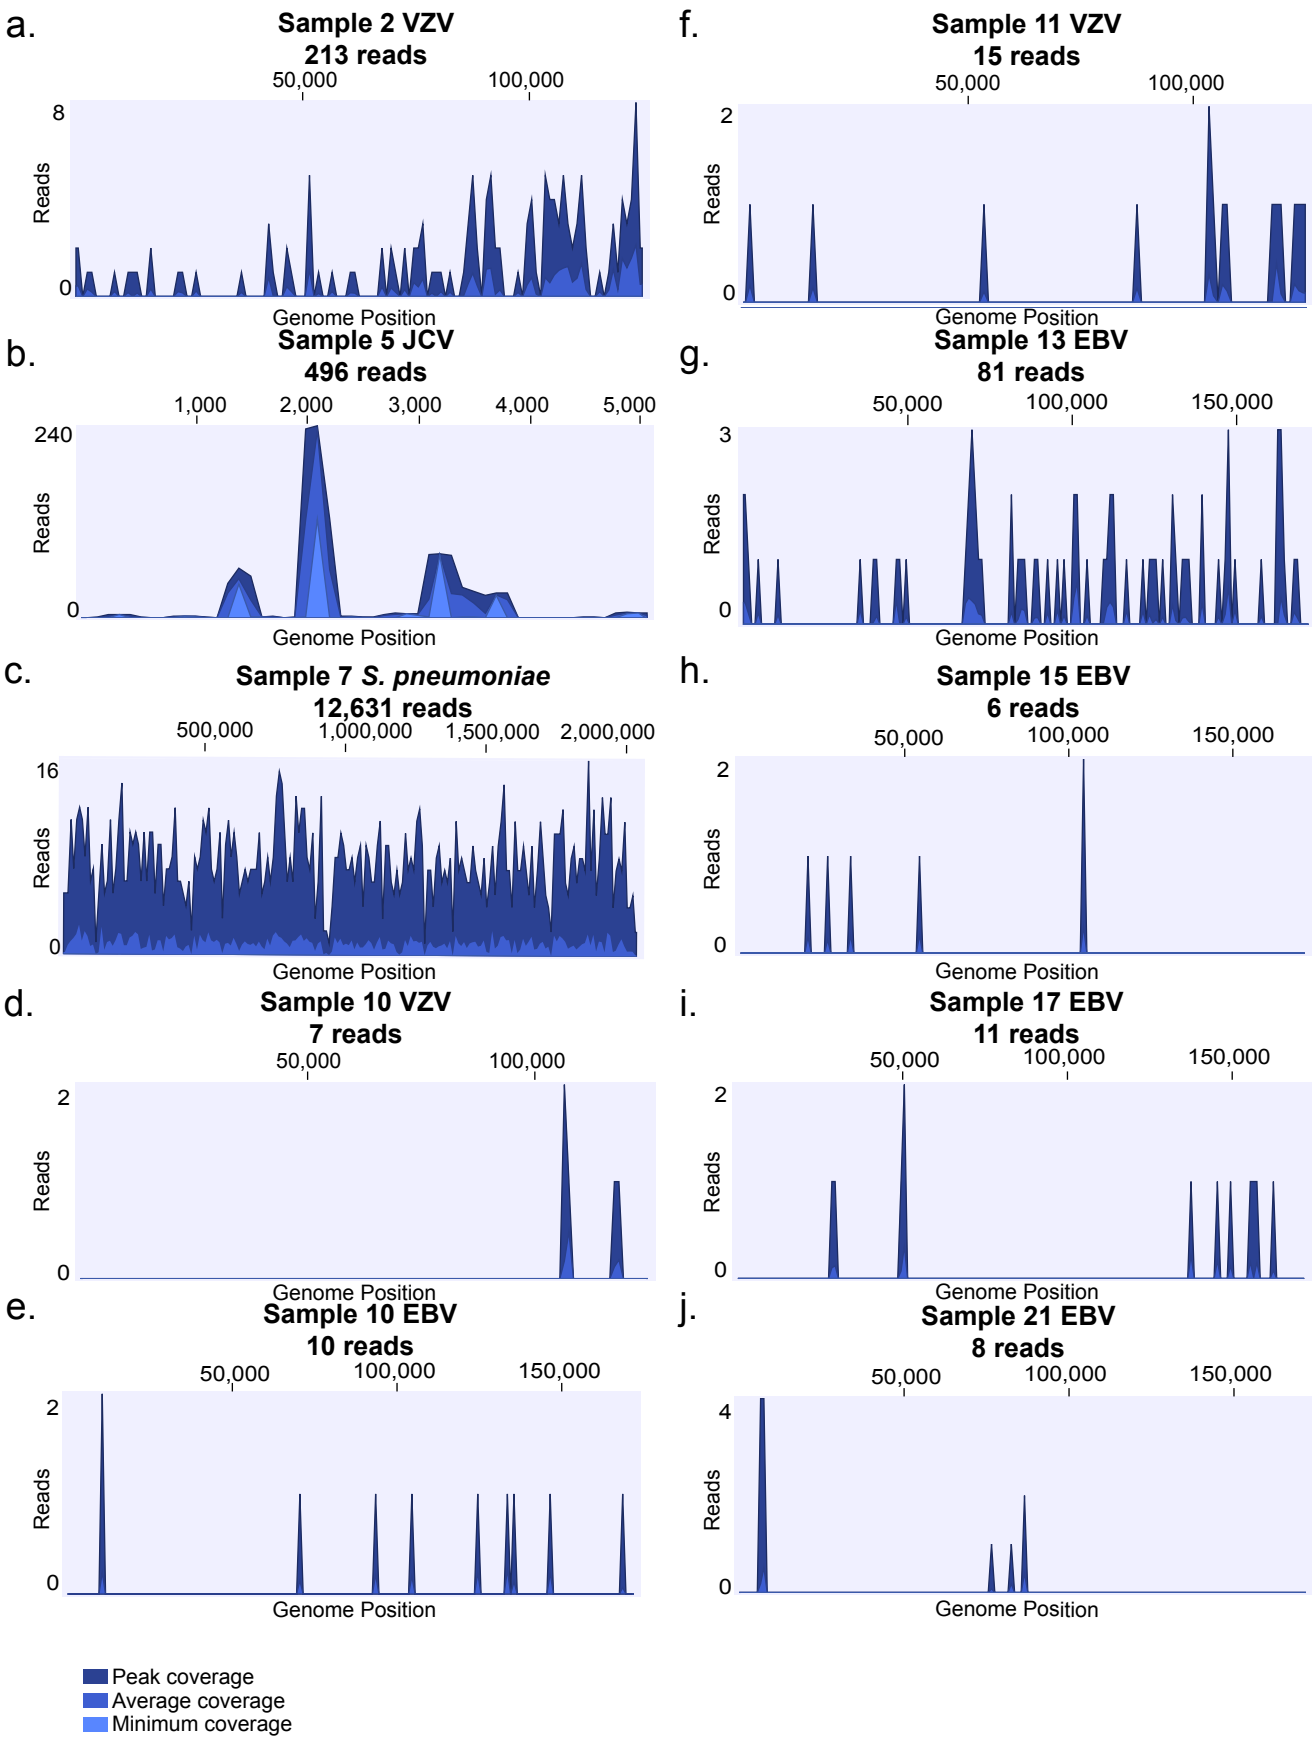

Reads from samples not shown in main figure mapped to reference genomes of (a) VZV (NC\_001348), (b) JCV (NC\_00196), (c) *S. pneumoniae* (NC\_003098), (d, f) VZV (NC\_001348), and (e, g-j) EBV (NC\_007605) using CLC Genomics Workbench. Number of reads (y-axis) at each nucleotide position of the genome (x-axis) depicted in blue. Dark blue represents peak, bright blue average and light blue minimum coverage for respective sections of the genome.

Additional figure 4. Cell control coverage density plot and reproducibility

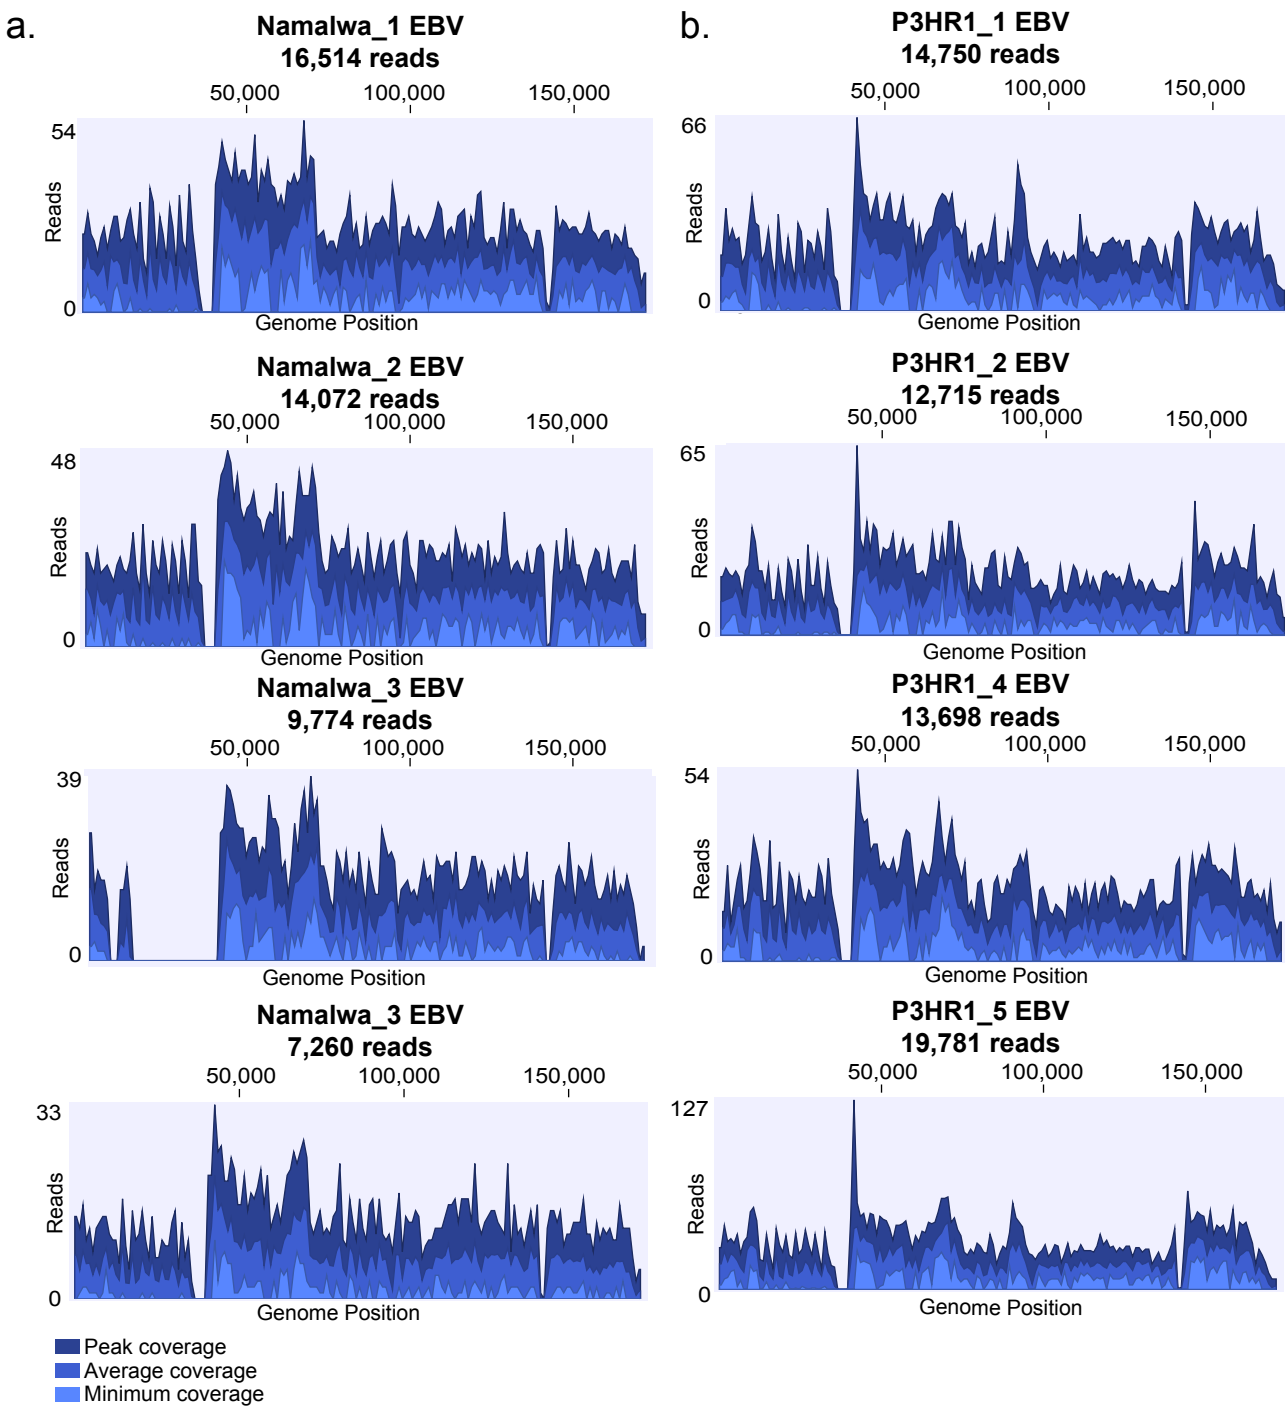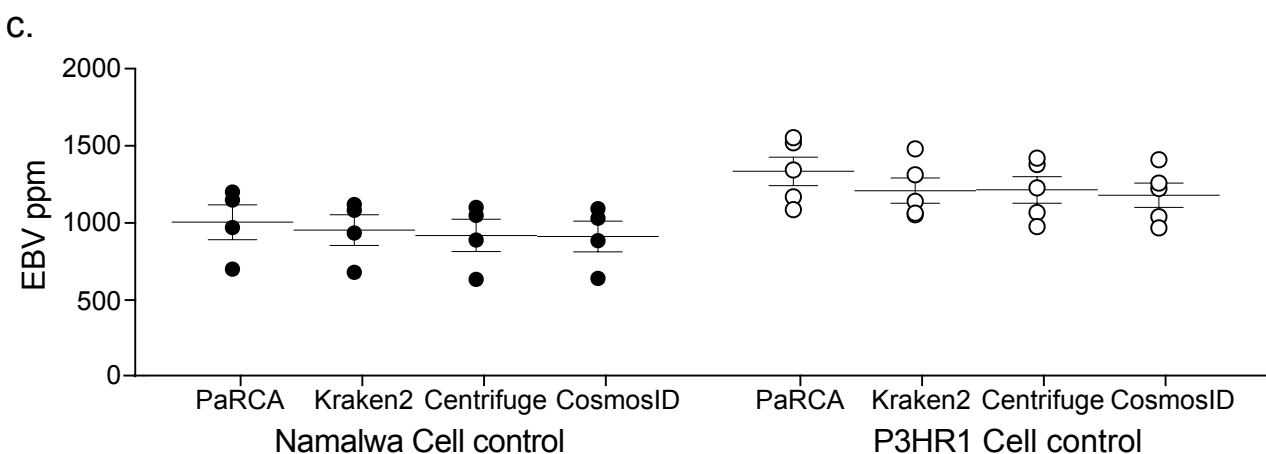

Coverage analysis of EBV reads detected in cell controls Namalwa (a) and P3HR1 (b) mapped to EBV reference genome (NC\_007605) using CLC Genomics Workbench. Number of reads (y-axis) at each nucleotide position of the genome (x-axis) depicted in blue. Dark blue represents peak, bright blue average and light blue minimum coverage for respective sections of the genome. EBV read fraction of sequencing library shown as parts per million reads (ppm) in each of the cell line controls for each of the bioinformatic classifiers (c), n=4 (Namalwa) or n=5 (P3HR1). Kruskal-Wallis test with Dunn's multiple comparisons show no significant difference between the pipelines.

# Additional figure 5. Coverage analysis for unexpected findings

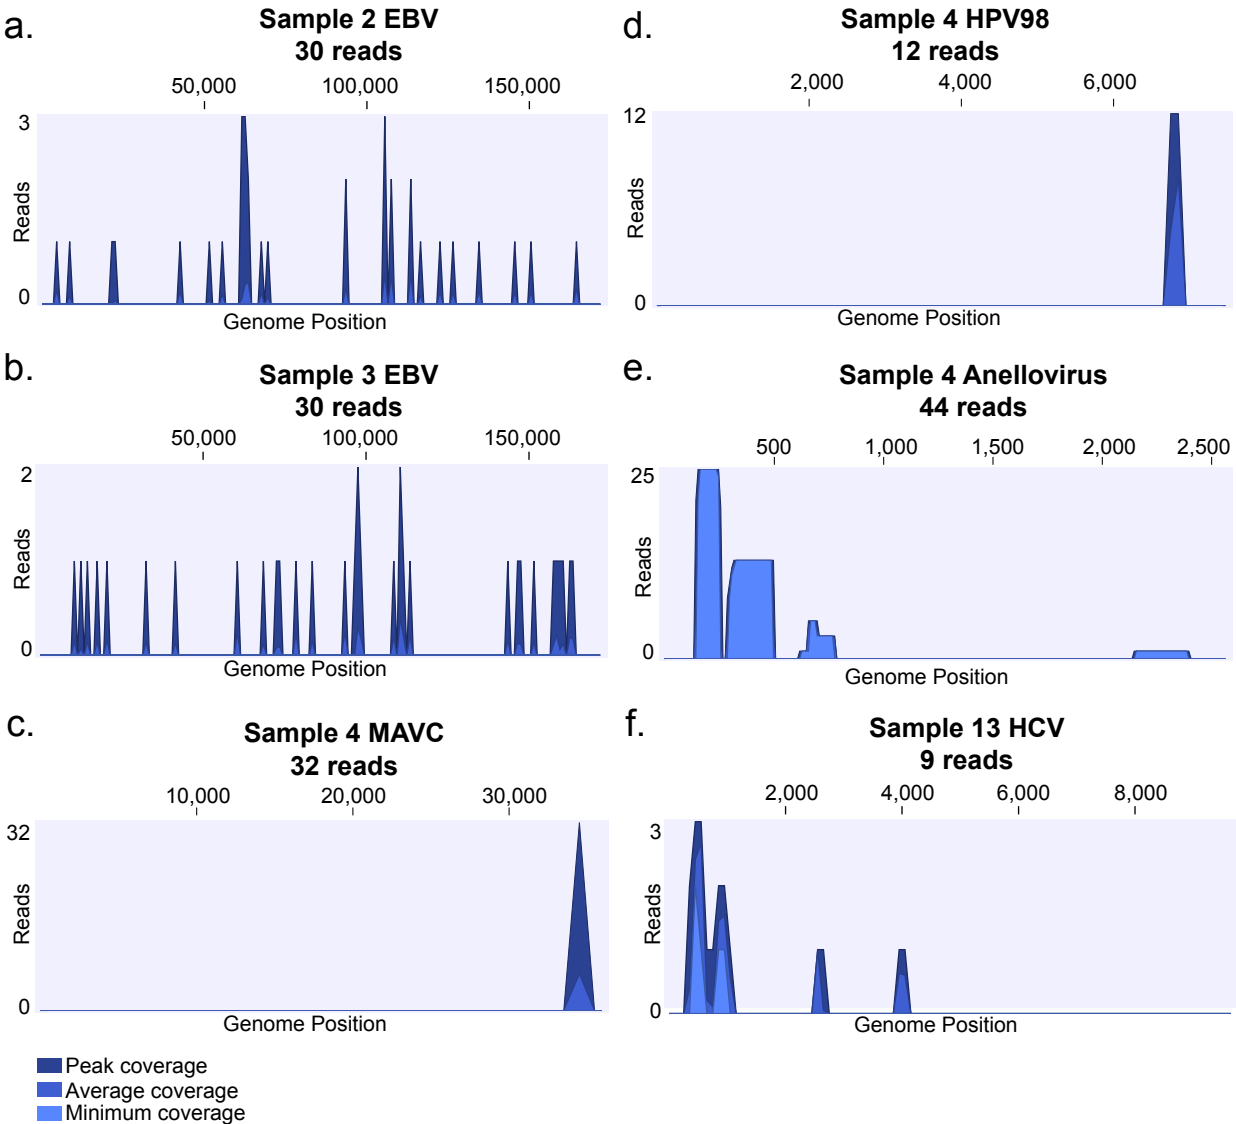

Reads from samples with ambiguous findings mapped to reference genomes of EBV NC\_007605 (a-b), Human Mastadenovirus C (MAVC) NC\_001405 (c), Human Papillomavirus 98 (HPV98) FM\_955837.2 (d), Anellovirus MH\_649255.1 (e), and HCV NC\_004102.1 (f), using CLC Genomics Workbench.
